# Supplementary material
Source: PubMed Central journal article supplement (PMC4310640)
Supplement: nn505660r_si_001.pdf [file nn505660r_si_001.pdf]

## Supporting Information

# Intrinsically Radioactive [ $^{64}\text{Cu}$ ]CuInS/ZnS Quantum Dots for PET and Optical Imaging: improved radiochemical stability and controllable Cerenkov luminescence

*Weisheng Guo,<sup>†,‡</sup> Xiaolian Sun,<sup>‡,\*</sup> Orit Jacobson,<sup>‡</sup> Xuefeng Yan,<sup>‡</sup> Kyunghyun Min,<sup>‡</sup> Avinash Srivatsan,<sup>‡</sup> Gang Niu,<sup>‡</sup> Dale O. Kieseewetter,<sup>‡</sup> Jin Chang,<sup>†,\*</sup> and Xiaoyuan Chen<sup>‡,\*</sup>*

<sup>†</sup>School of Materials Science and Engineering, School of Life Sciences, Tianjin University, Tianjin, 300072, China

<sup>‡</sup>Laboratory of Molecular Imaging and Nanomedicine (LOMIN), National Institute of Biomedical Imaging and Bioengineering (NIBIB), National Institutes of Health (NIH), Bethesda, MD 20892, USA

### Corresponding Author

\*Xiaolian Sun: Email: [xiaolian.sun@nih.gov](mailto:xiaolian.sun@nih.gov)

\*Jin Chang: Email: [jinchang@tju.edu.cn](mailto:jinchang@tju.edu.cn)

\*Xiaoyuan Chen: Email: [shawn.chen@nih.gov](mailto:shawn.chen@nih.gov)

## **Materials.**

Copper(II) chloride ( $\text{CuCl}_2 \cdot 2\text{H}_2\text{O}$ , 99.0%), indium chloride ( $\text{InCl}_3$ , 99.9%), zinc chloride ( $\text{ZnCl}_2$ , 99.9%), sodium hydroxide ( $\text{NaOH}$ , 97%), sodium sulfide ( $\text{Na}_2\text{S} \cdot 9\text{H}_2\text{O}$ , 98%) and L-glutathione (GSH, reduced) were purchased from Sigma-Aldrich. Methoxy-PEG-thiol (mPEG-SH;  $M_w=5000$  Da) was purchased from Nanocs (New York, NY).  $^{64}\text{CuCl}_2$  was produced by the PET Department, NIH. Deionized (DI) water with resistivity of  $18.2 \text{ M}\Omega$  was from a Millipore Autopure system. Ethanol (99.7%) and PD-10 columns were purchased from Fisher Scientific. All of the chemicals and solvents were at least ACS-grade and used without further purification.

## **Preparation of stock solutions**

Copper stock solution (0.02 M) was obtained by dissolving  $\text{CuCl}_2$  (0.2 mmol) in 10 ml of DI water. Indium stock solution (0.4 M) was prepared by dissolving  $\text{InCl}_3$  (1 mmol) in 2.5 ml of DI water. Glutathione (GSH) stock solution (0.1 M) was prepared by dissolving GSH (1 mmol) in 10 ml of DI water.  $\text{Na}_2\text{S}$  solution (0.06 M) was freshly prepared by dissolving  $\text{Na}_2\text{S}$  (0.6 mmol) in 10 ml of DI water. The zinc stock solution (0.05 M) was obtained by dissolving  $\text{ZnCl}_2$  (0.5 mmol) and GSH (0.5 mmol) in 8 ml of DI water and the pH value was adjusted to 8.0 by adding 2 ml of  $\text{NaOH}$  (1 M) solution. All the stock solutions were prepared at room temperature and stored in  $4^\circ\text{C}$  for 2 weeks.

## **PL QYs determination**

Photoluminescence QYs of CIS/ZnS QDs were determined by comparison of the integrated fluorescence intensity with Rhodamine 6G (in ethanol, PL QY=95%) with the same optical density (0.05~0.1) at the excitation wavelength (470 nm), following the equation: [1,2]

$$QY_{QDs} = 0.95 \cdot \frac{I_{QDs}}{I_{R6G}} \cdot \left(\frac{n_{water}}{n_{ethanol}}\right)^2 \cdot \frac{A_{R6G}}{A_{QDs}}$$

Where  $I_{QDs}$  and  $I_{R6G}$  are the integrated fluorescence intensity of QDs and Rhodamine 6G solution, respectively;  $n_{water}$  and  $n_{ethanol}$  are the refractive indexes of the solvents (water and ethanol) in which QDs and Rhodamine 6G sample are dissolved, respectively;  $A_{R6G}$  and  $A_{QDs}$  present the absorption of the Rhodamine 6G and QDs solution at 470 nm, respectively.

### **In vitro and in vivo CRET luminescence imaging**

For the in vitro investigation, 200  $\mu$ l of aqueous suspensions of different samples were placed in the 96-well black plate (Greiner Bio-One, Monroe, NC) in the light-tight chamber. All the luminescent images were acquired after 4 min scanning with various filters. For the in vivo imaging, the anesthetized mice were placed into the chamber and the images were acquired. The acquired images were analyzed by the Living Image 3.0 software (Caliper Life Science, Hopkinton, MA) and the signal was normalized to photons per second per centimeter square per steradian (p/s/cm<sup>2</sup>/sr).

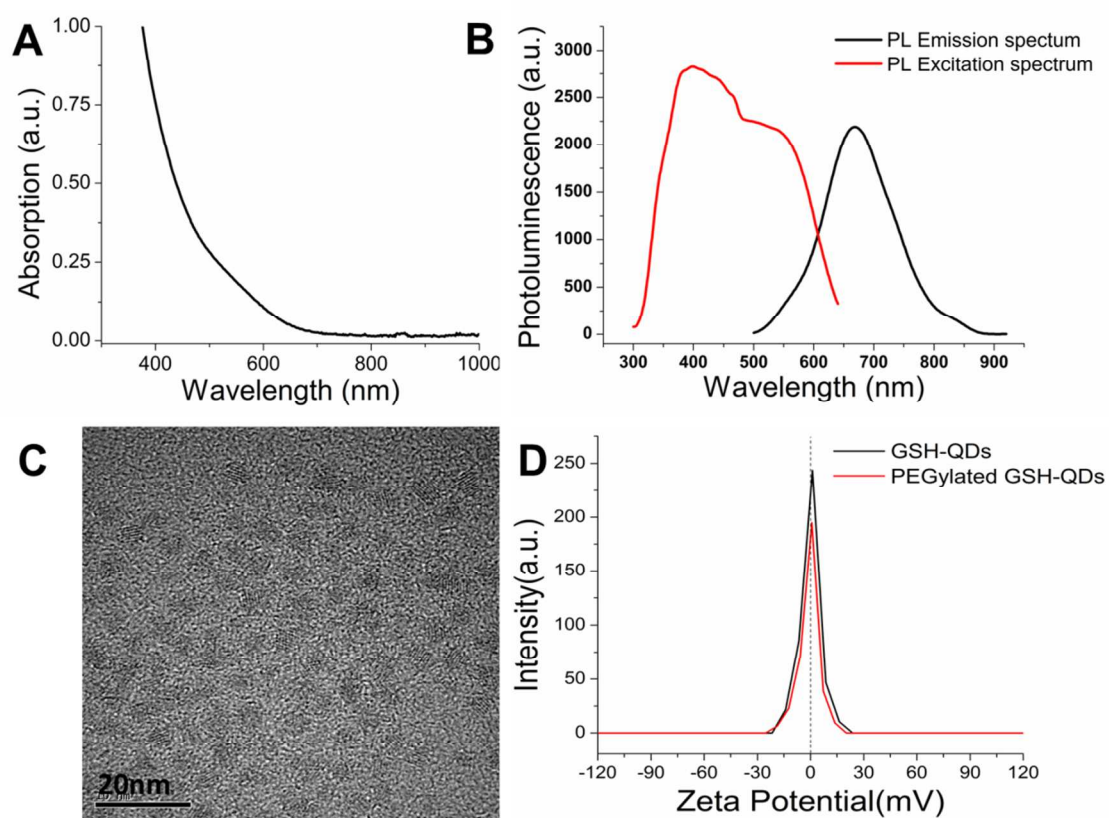

**Figure S1.** The absorption spectra (A), The PL emission ( $\lambda_{exc}=470$  nm) and excitation spectrum (B), TEM image (C) and Zeta potential (D) of CIS/ZnS QDs.

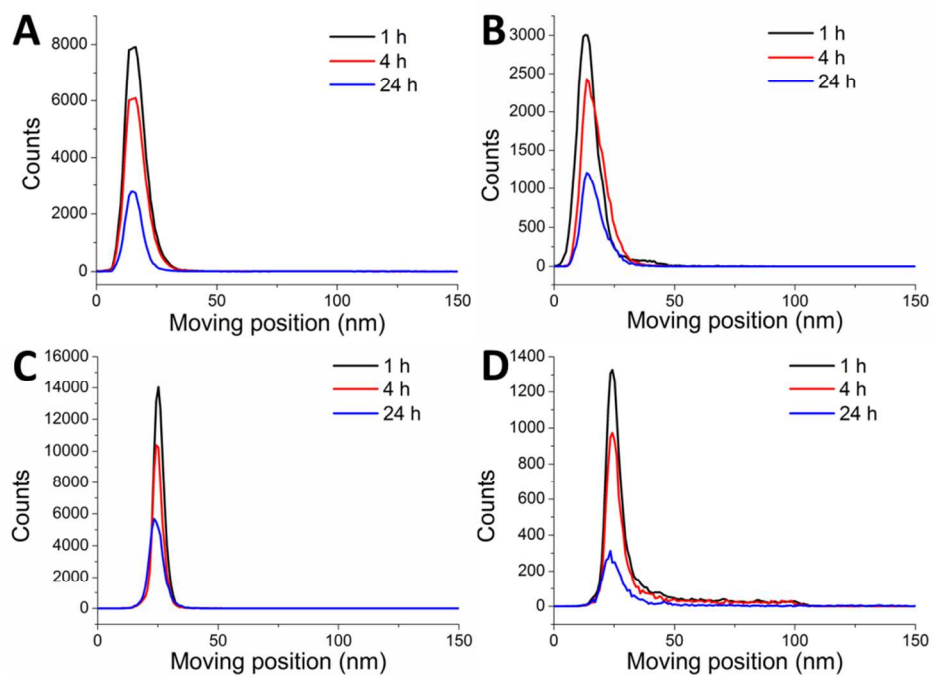

**Figure S2.** The radio instant thin-layer chromatography profiles of the  $[^{64}\text{Cu}]\text{CIS}/\text{ZnS}$  RQDs in PBS (A), PBS with EDTA (B), mouse serum (C) and mouse serum with EDTA (D) at 1 h, 4 h, 24 h and 48 h post incubation at  $37^\circ\text{C}$

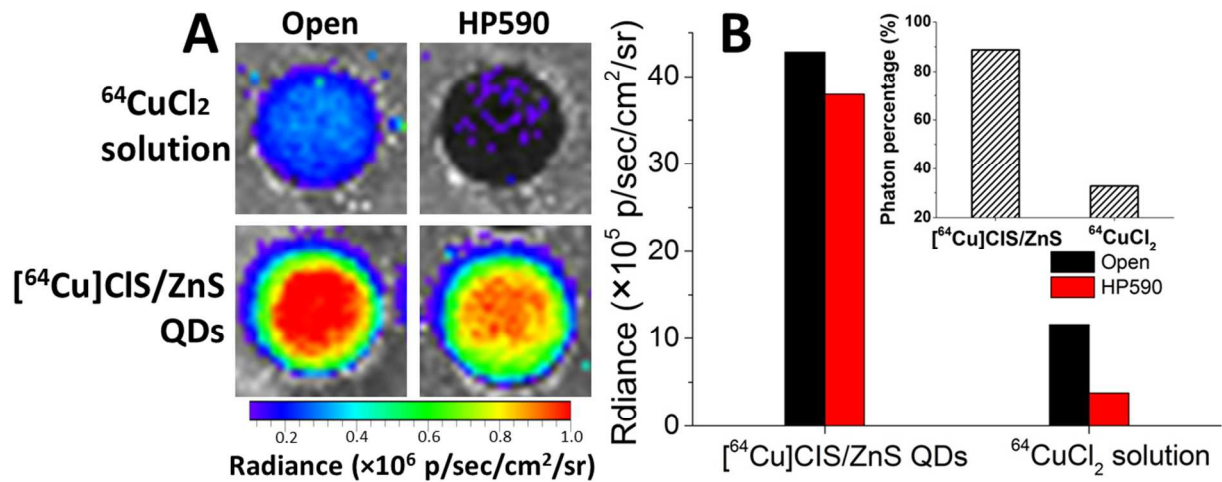

**Figure S3.** A, Cerenkov luminescence images of aqueous suspension of  $^{64}\text{CuCl}_2$  and  $^{64}\text{Cu}$ ]CIS/ZnS RQDs with open and red filter different amount of Radioactivity and QDs in a 96-well plate. B, The corresponding photon flux with different filters. Insert, the percentage of photon flux under red filter in the total photon flux obtained with open filter. The radioactivity of the aqueous suspension was 120  $\mu\text{Ci}$ .

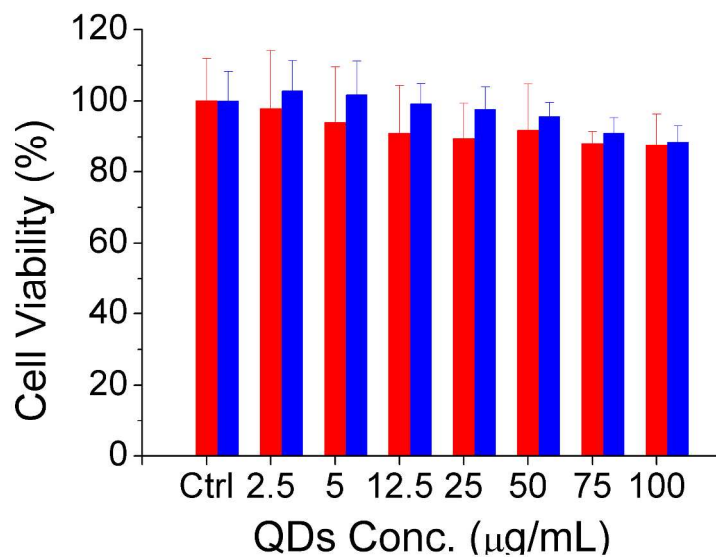

**Figure S4.** In vitro cytotoxicity assay on U87MG cells exposed to different concentrations of PEGylated GSH-CIS/ZnS QDs (Red) and GSH-CIS/ZnS QDs (Blue).

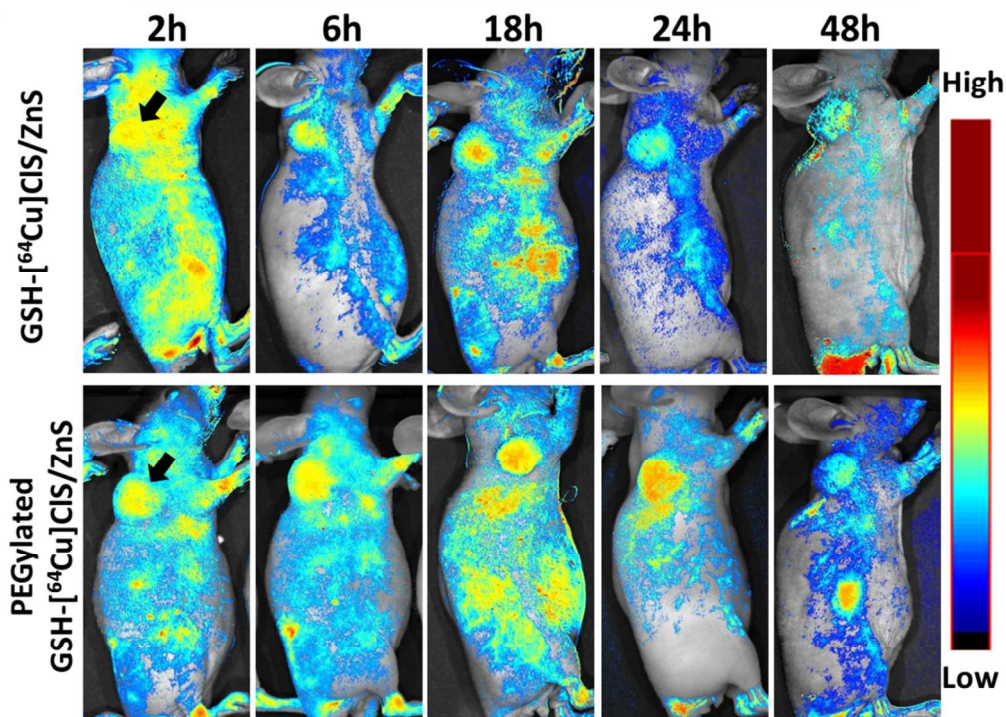

**Figure S5.** Representative PL images of U87MG tumor-bearing mice at 2 h, 6 h, 18 h, 24 h and 48 h after intravenous injection of 100  $\mu\text{l}$  (300  $\mu\text{Ci}$ ) of GSH- $^{64}\text{Cu}$ ]CIS/ZnS and PEGylated GSH- $^{64}\text{Cu}$ ]CIS/ZnS RQDs (3 mice each group). These PL images were acquired on Maestro *In Vivo* Imaging System with blue light excitation. Arrow indicates location of the tumor. (Move to SI)

## Reference

- 1 Rurack, K.; Spieles, M. Fluorescence Quantum Yields of a Series of Red and Near-Infrared Dyes Emitting at 600– 1000 nm. *Anal. Chem.* **2011**, *83*, 1232-1242.
- 2 Grabolle, M.; Spieles, M.; Lesnyak, V.; Gaponik, N.; Eychmüller, A.; Resch-Genger, U. Determination of the Fluorescence Quantum Yield of Quantum Dots: Suitable Procedures and Achievable Uncertainties. *Anal. Chem.* **2009**, *81*, 6285-6294.
